# Supplementary material for: A heterostructured TiO2–C3N4support for gold catalysts: a superior preferential oxidation of CO in the presence of H2under visible light irradiation and without visible light irradiation
Source: Royal Society of Chemistry journal article supplement (doi:10.1039/c5cy01009h), 2015-08-25
Supplement: c5cy01009h1.pdf [file c5cy01009h1.pdf]

## Supporting information

### **A heterostructured TiO<sub>2</sub>-C<sub>3</sub>N<sub>4</sub> support for gold catalysts: a superior preferential oxidation of CO in the presence of H<sub>2</sub> under visible light irradiation or not**

**Kai Yang, Chao Meng, Liulu Lin, Xiaoying Peng, Xun Chen, Xuxu Wang, Wenxin Dai\*,  
Xianzhi Fu**

*Research Institute of Photocatalysis, State Key Laboratory of Photocatalysis on Energy and  
Environment, Fuzhou University, Fuzhou, 350002, China*

\*Corresponding author: Wenxin Dai

Tel & Fax: +86-591-83779083

E-mail: daiwenxin@fzu.edu.cn

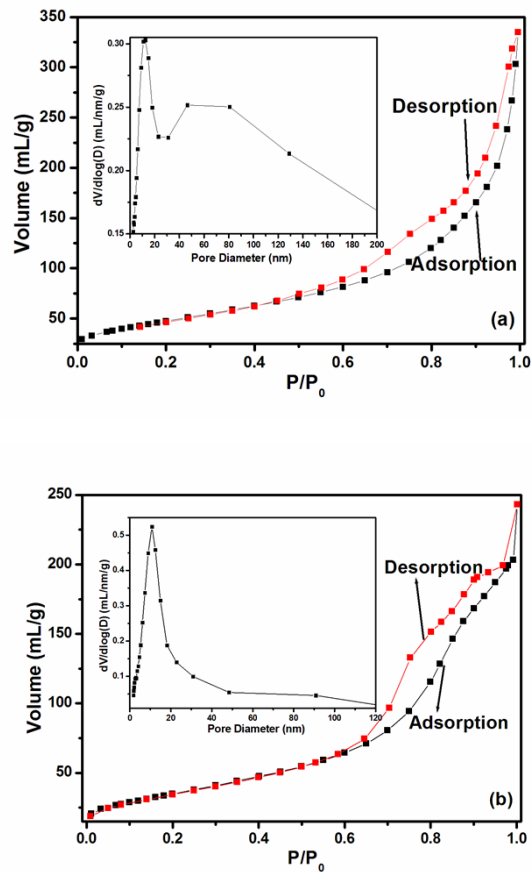

**Fig. 1s** N<sub>2</sub> adsorption–desorption isotherms and the BJH pore size distributions (inset) plots of Au/TiO<sub>2</sub> (a) and Au/TiO<sub>2</sub>-C<sub>3</sub>N<sub>4</sub> (b) samples.

**Table 1s** The results of N<sub>2</sub> physical adsorption of Au/TiO<sub>2</sub> and Au/TiO<sub>2</sub>-C<sub>3</sub>N<sub>4</sub> samples.

| Samples                                            | BET Surface Area (m <sup>2</sup> /g) | Pore Radius (nm) |
|----------------------------------------------------|--------------------------------------|------------------|
| Au/TiO <sub>2</sub>                                | 142.9                                | 11.7             |
| Au/TiO <sub>2</sub> -C <sub>3</sub> N <sub>4</sub> | 128.4                                | 11.4             |

The Barrett–Joyner–Halenda (BJH) pore size distribution (inset of Fig.1s) obtained from the isotherm indicates the pores ranging from 10 nm to 20 nm. Table 1s shows that the Au/TiO<sub>2</sub> and Au/TiO<sub>2</sub>-C<sub>3</sub>N<sub>4</sub> have higher values of specific surface areas, specific pore volumes. N<sub>2</sub> adsorption analysis and the BET specific surface area of Au/TiO<sub>2</sub> after the C<sub>3</sub>N<sub>4</sub> composition decreased,
